# Supplementary material for: Tipping the ENSO into a permanent El Niño can trigger state transitions in global terrestrial ecosystems
Source: Copernicus journal article supplement (doi:10.5194/esd-2019-14), 2019-04-10
Supplement: Supplementary file 1 [file esd-2019-14-supplement.pdf]

# Supplementary information for *Tipping the ENSO into a permanent El Niño can trigger state transitions in global terrestrial ecosystems*

Mateo Duque-Villegas<sup>1</sup>, Juan F. Salazar<sup>1</sup>, and Angela M. Rendón<sup>1</sup>

<sup>1</sup>GIGA, Escuela Ambiental, Facultad de Ingeniería, Universidad de Antioquia, Medellín, Colombia

**Correspondence:** Juan F. Salazar (juan.salazar@udea.edu.co)

## List of Tables

|    |                                             |   |
|----|---------------------------------------------|---|
| S1 | Non-reanalysis observational data . . . . . | 2 |
| S2 | ERA-Interim data . . . . .                  | 3 |

## List of Figures

|    |     |                                                                                                            |    |
|----|-----|------------------------------------------------------------------------------------------------------------|----|
| 5  | S1  | Prescribed SST climatology in simulations . . . . .                                                        | 4  |
|    | S2  | Seasonal means of near surface temperature for CTL compared with HadCRUT4 . . . . .                        | 5  |
|    | S3  | Seasonal means of total precipitation rate for CTL compared with GPCP . . . . .                            | 6  |
|    | S4  | Seasonal means of GPP for CTL compared with MODIS . . . . .                                                | 7  |
|    | S5  | Seasonal means of mean sea level pressure for CTL compared with HadSLP2 . . . . .                          | 8  |
| 10 | S6  | Differences in seasonal means in PEN compared to CTL of temperature and daily precipitation . . . . .      | 9  |
|    | S7  | Differences in seasonal means in PEN compared to CTL of GPP and mean sea level pressure . . . . .          | 10 |
|    | S8  | Differences in zonal average annual means at different pressure levels for PEN compared with CTL . . . . . | 11 |
|    | S9  | Annual mean evapotranspiration from CTL simulation used in MCWD calculation . . . . .                      | 12 |
|    | S10 | Saturation month used in MCWD calculation and precipitation minus evapotranspiration . . . . .             | 13 |

**Table S1.** Observational data sets derived from satellite and ground-based measurements.

| <b>Quantity</b>                                | <b>Data set</b>  | <b>Institution</b>                                                          | <b>Period</b> | <b>Grid res.</b> | <b>Step</b> | <b>Reference</b>        |
|------------------------------------------------|------------------|-----------------------------------------------------------------------------|---------------|------------------|-------------|-------------------------|
| Surface temperature (°C)                       | AMIP II v.1.1.3  | PCMDI                                                                       | 1979–2010     | 1°               | Monthly     | Hurrell et al. (2008)   |
| Near surface temperature (°C)                  | HadCRUT4 v.4.6.0 | Met Office Hadley Centre, Climatic Research Unit, University of East Anglia | 1988–2017     | 5°               | Monthly     | Morice et al. (2012)    |
| Precipitation (mm day <sup>-1</sup> )          | GPCP v.2.3       | WCRP/GEWEX                                                                  | 1987–2016     | 2.5°             | Monthly     | Adler et al. (2003)     |
| Mean sea level pressure (mb)                   | HadSLP2          | Met Office Hadley Centre                                                    | 1979–2004     | 5°               | Monthly     | Allan and Ansell (2006) |
| GPP (dg C m <sup>-2</sup> year <sup>-1</sup> ) | MOD17A2 v.55     | Numerical Terradynamic Simulation Group, University of Montana              | 2000–2015     | 1 km             | Monthly     | Zhao et al. (2005)      |

**Table S2.** Data obtained from ERA-Interim reanalysis (Dee et al., 2011). All data had a  $2.5^\circ \times 2.5^\circ$  horizontal resolution and covered the time span 1987–2016.

| Quantity                                                  | Parameter | Stream | Time        | Step |
|-----------------------------------------------------------|-----------|--------|-------------|------|
| <i>At pressure levels 50–1000 hPa:</i>                    |           |        |             |      |
| Air temperature (K)                                       | 130       | MODA   | –           | –    |
| Zonal wind ( $\text{m s}^{-1}$ )                          | 131       | MODA   | –           | –    |
| Meridional wind ( $\text{m s}^{-1}$ )                     | 132       | MODA   | –           | –    |
| <i>Radiation budget:</i>                                  |           |        |             |      |
| Surface sensible heat flux ( $\text{J m}^{-2}$ )          | 146       | MNTH   | 00:00,12:00 | 12   |
| Surface latent heat flux ( $\text{J m}^{-2}$ )            | 147       | MNTH   | 00:00,12:00 | 12   |
| Surface solar radiation downwards ( $\text{J m}^{-2}$ )   | 169       | MNTH   | 00:00,12:00 | 12   |
| Surface thermal radiation downwards ( $\text{J m}^{-2}$ ) | 175       | MNTH   | 00:00,12:00 | 12   |
| Surface net solar radiation ( $\text{J m}^{-2}$ )         | 176       | MNTH   | 00:00,12:00 | 12   |
| Surface net thermal radiation ( $\text{J m}^{-2}$ )       | 177       | MNTH   | 00:00,12:00 | 12   |
| Top net solar radiation ( $\text{J m}^{-2}$ )             | 178       | MNTH   | 00:00,12:00 | 12   |
| Top net thermal radiation ( $\text{J m}^{-2}$ )           | 179       | MNTH   | 00:00,12:00 | 12   |
| Total incoming solar radiation ( $\text{J m}^{-2}$ )      | 212       | MNTH   | 00:00,12:00 | 12   |
| <i>Water budget:</i>                                      |           |        |             |      |
| Evaporation (m)                                           | 182       | OPER   | 00:00,12:00 | 12   |
| Total precipitation (m)                                   | 228       | OPER   | 00:00,12:00 | 12   |
| Total column water vapour (mm)                            | 137       | MODA   | –           | –    |
| <i>For meridional stream function:</i>                    |           |        |             |      |
| Surface pressure (Pa)                                     | 134       | MODA   | –           | –    |

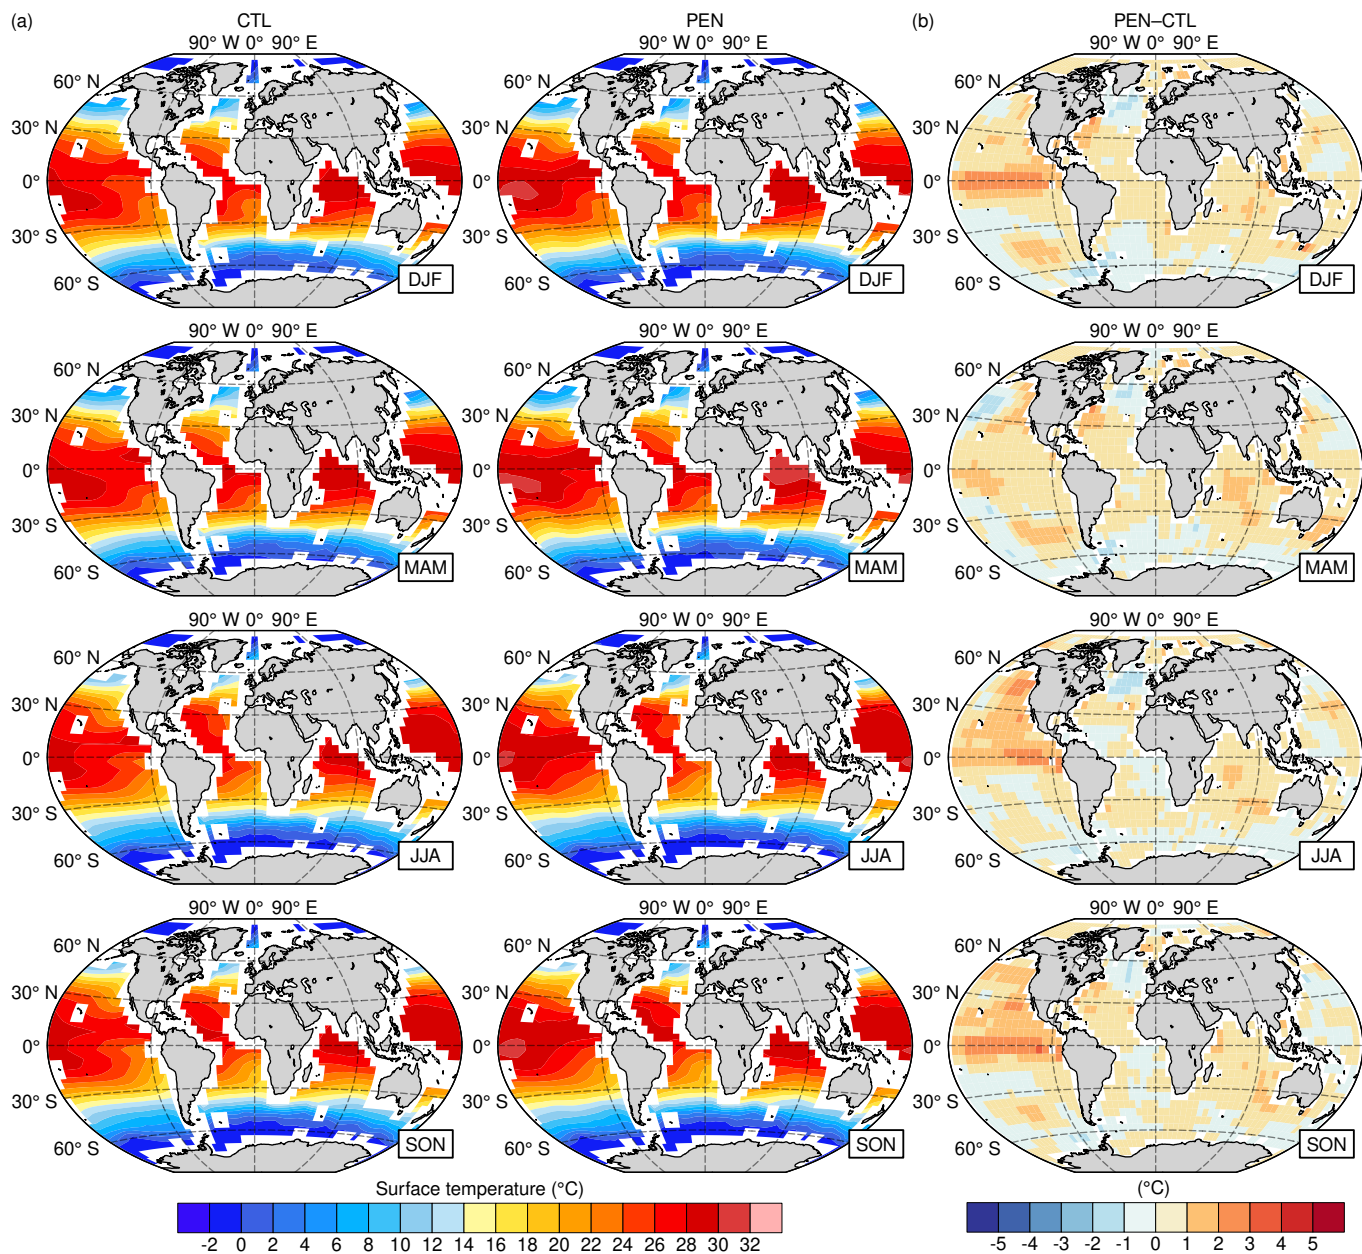

**Figure S1.** Prescribed SST climatology seasonal means for CTL and PEN simulations (a) and their absolute difference (b).

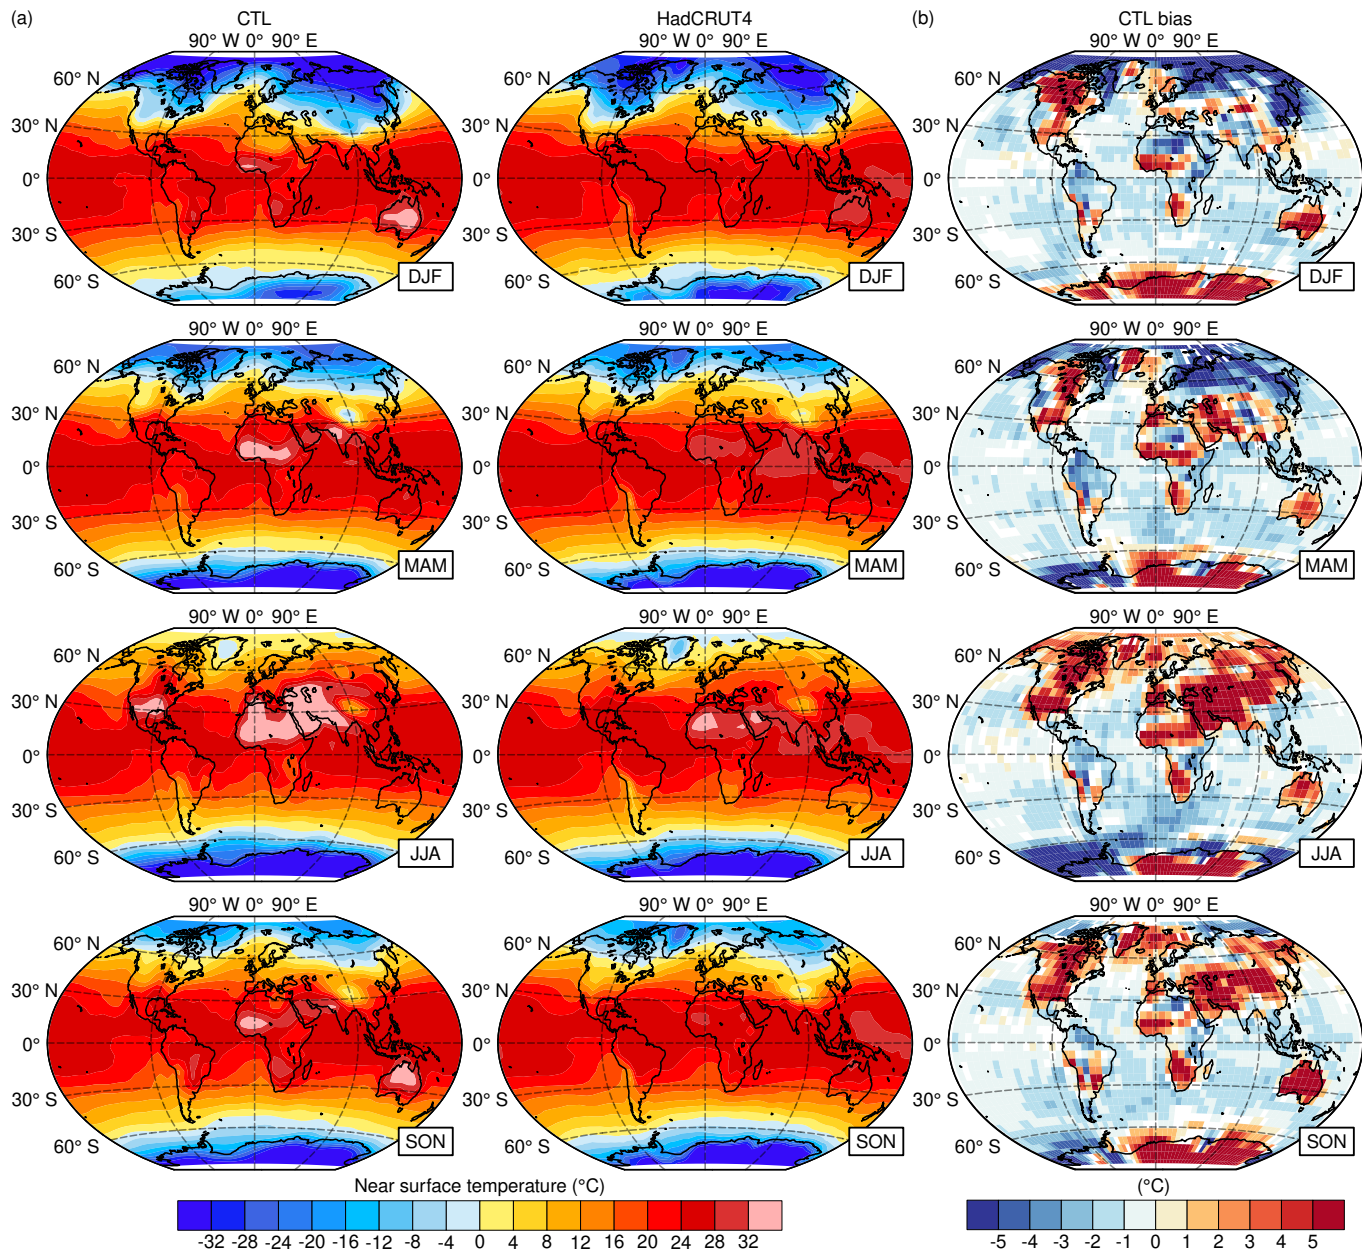

**Figure S2.** Seasonal means results of (a) near surface temperature for the CTL simulation and observational data from HadCRUT4 and (b) model bias. In the bias panels, white depicts gridpoints with statistically non-significant difference ( $\alpha = 0.05$ ).



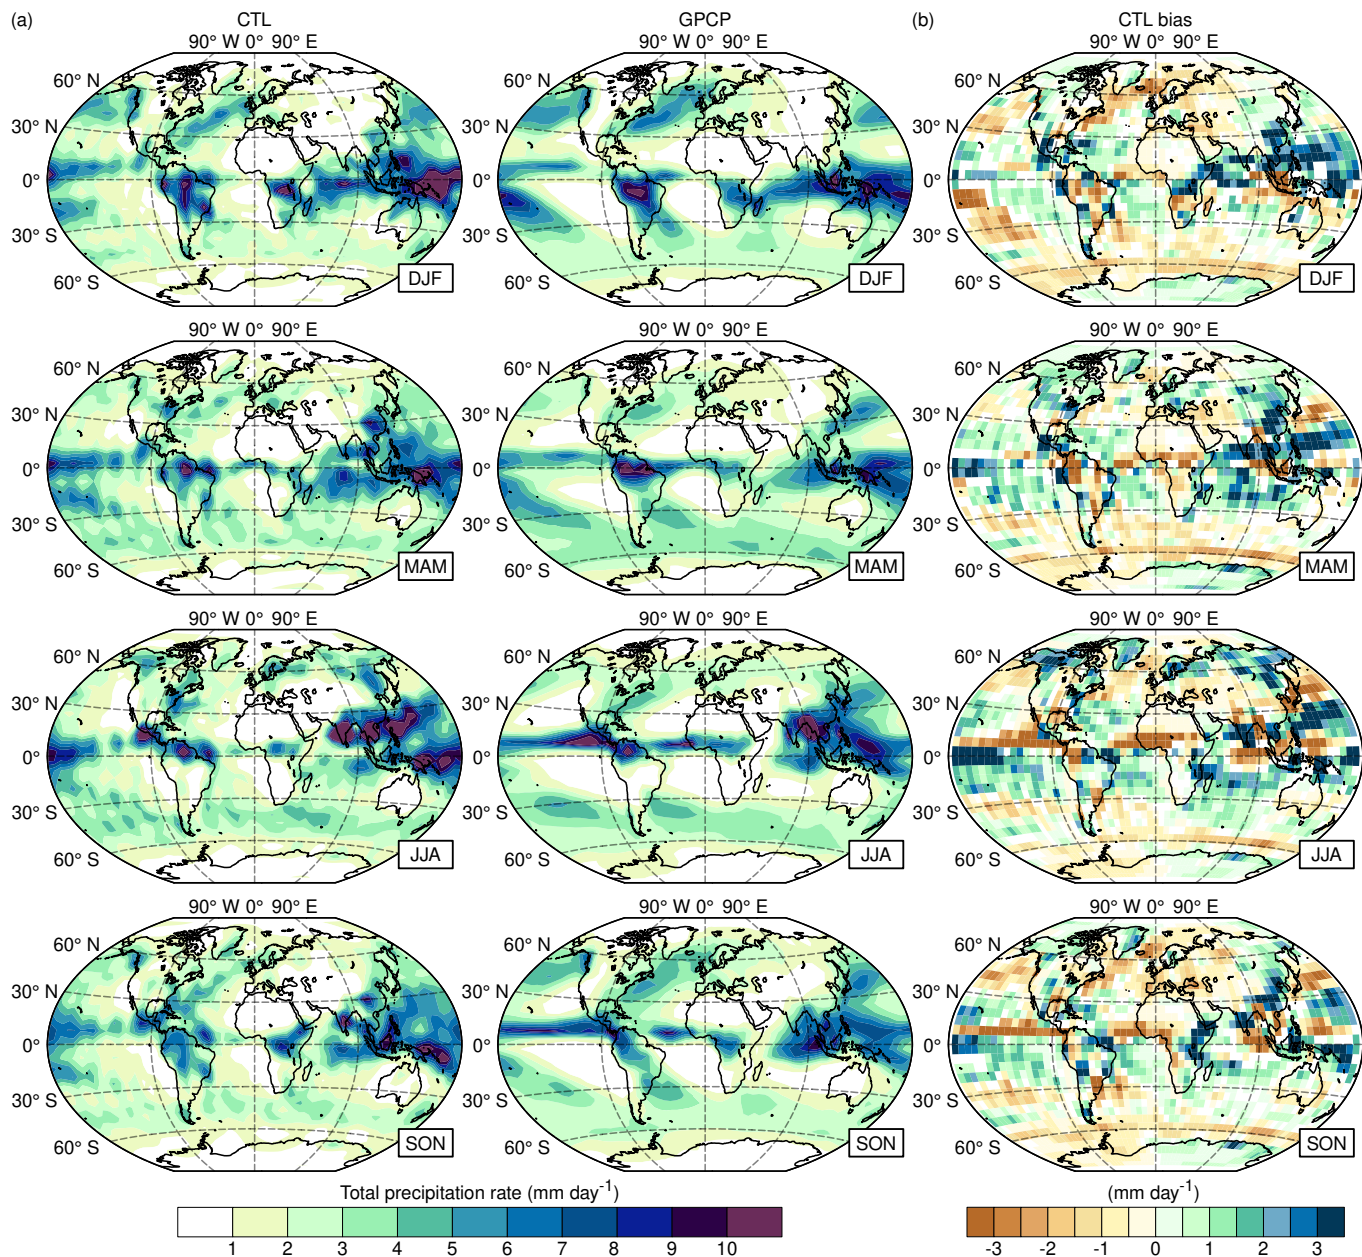

**Figure S3.** Seasonal means results of (a) total daily precipitation for the CTL simulation and observational data from GPCP and (b) model bias. In the bias panels, white depicts gridpoints with statistically non-significant difference ( $\alpha = 0.05$ ).

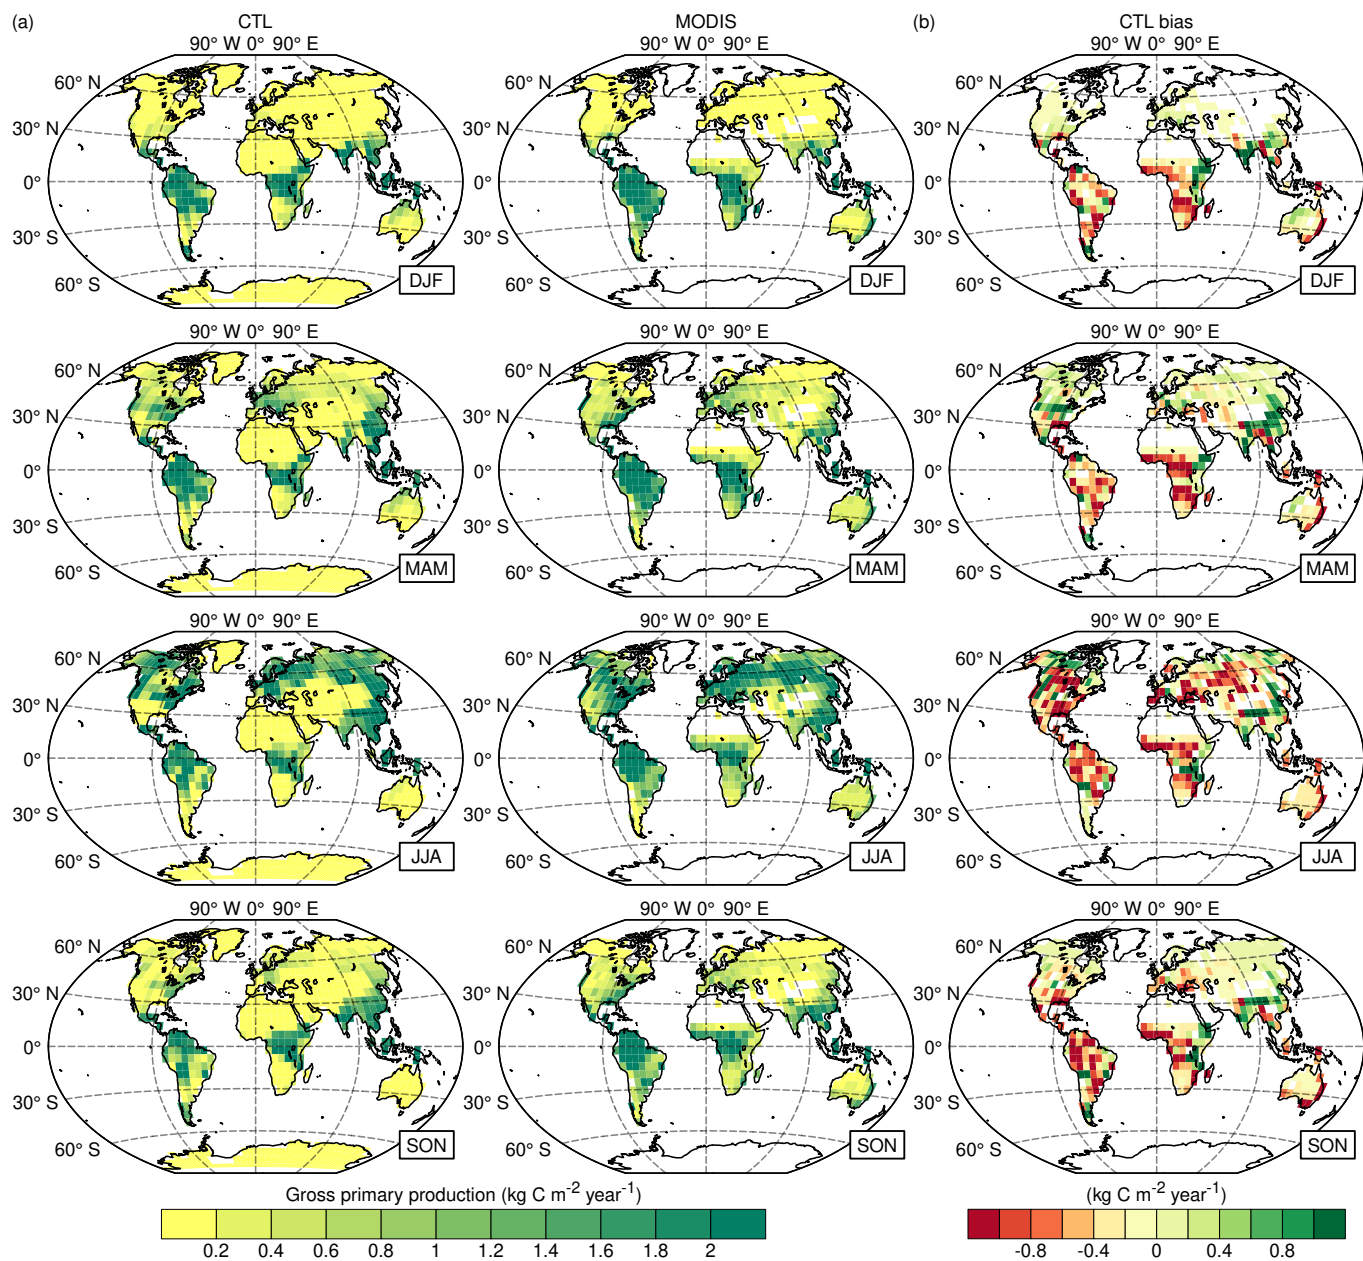

**Figure S4.** Seasonal means results of (a) GPP for the CTL simulation compared with observational data from MODIS and (b) model bias. In the bias panels, white is for statistically non-significant difference ( $\alpha = 0.05$ ).

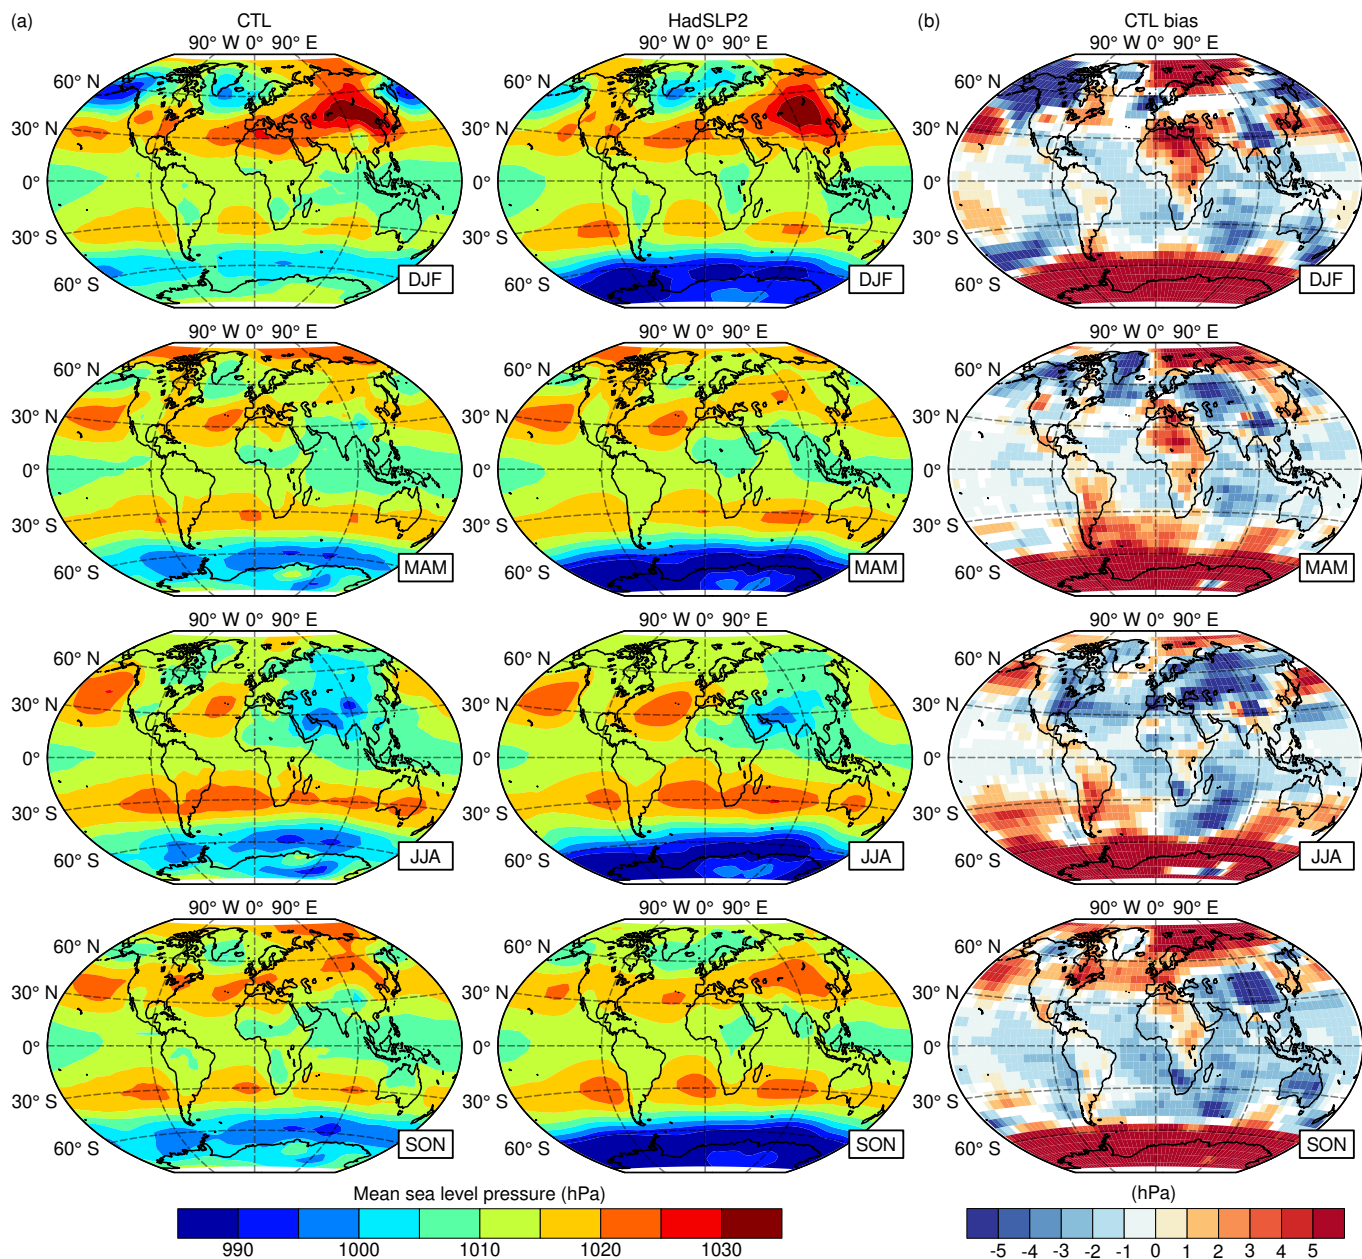

**Figure S5.** Seasonal mean results of (a) mean sea level pressure for the CTL simulation compared with observational data from HadSLP2 and (b) model bias. In the bias panels, white depicts gridpoints with statistically non-significant difference ( $\alpha = 0.05$ ).



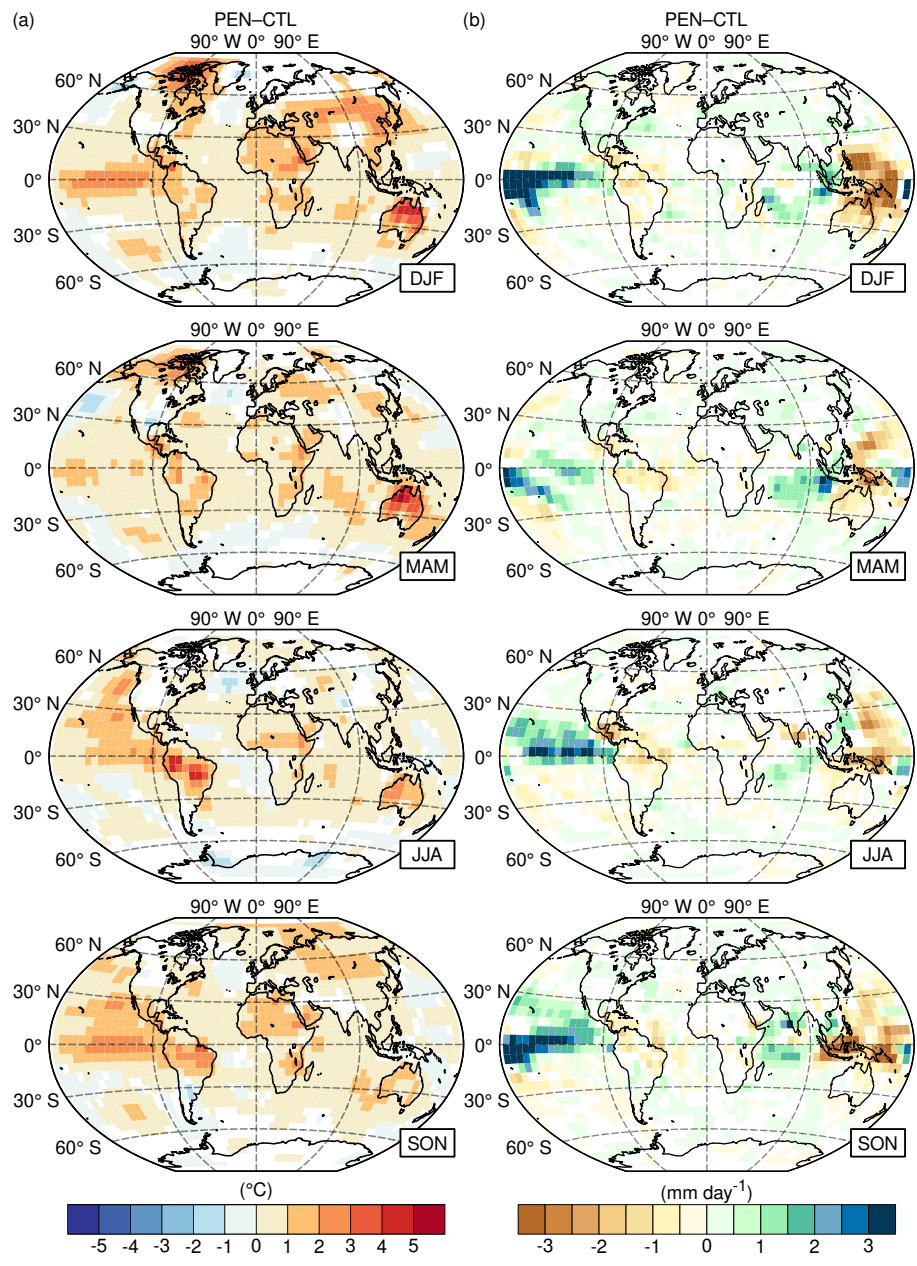

**Figure S6.** Differences in seasonal means results for the PEN simulation compared with the CTL simulation (PEN minus CTL) of (a) near surface temperature and (b) daily precipitation. In all panels, white depicts gridpoints with statistically non-significant difference ( $\alpha = 0.05$ ).

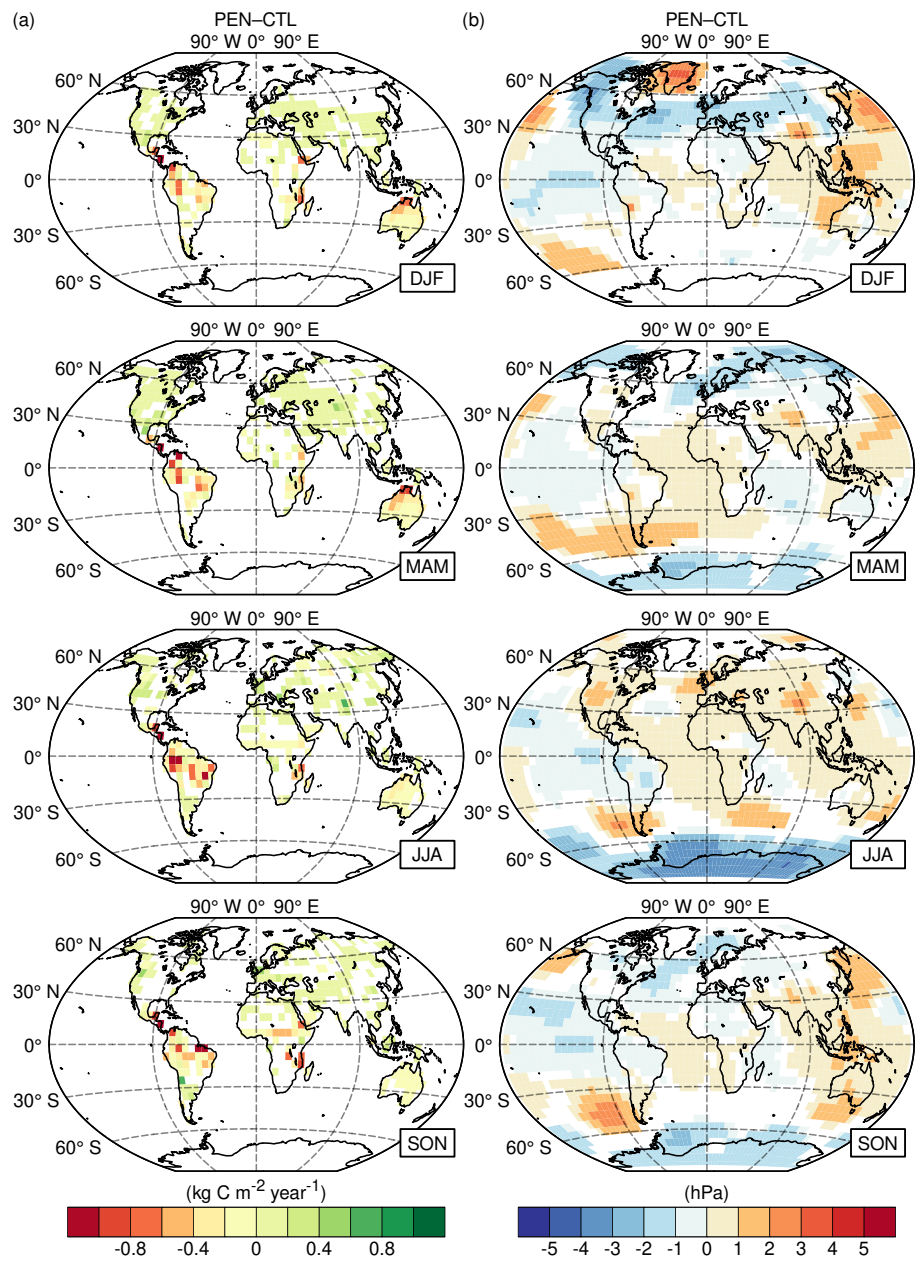

**Figure S7.** Differences in seasonal means results for the PEN simulation compared with the CTL simulation (PEN minus CTL) of (a) GPP and (b) mean sea level pressure. In all panels, white depicts gridpoints with statistically non-significant difference ( $\alpha = 0.05$ ).

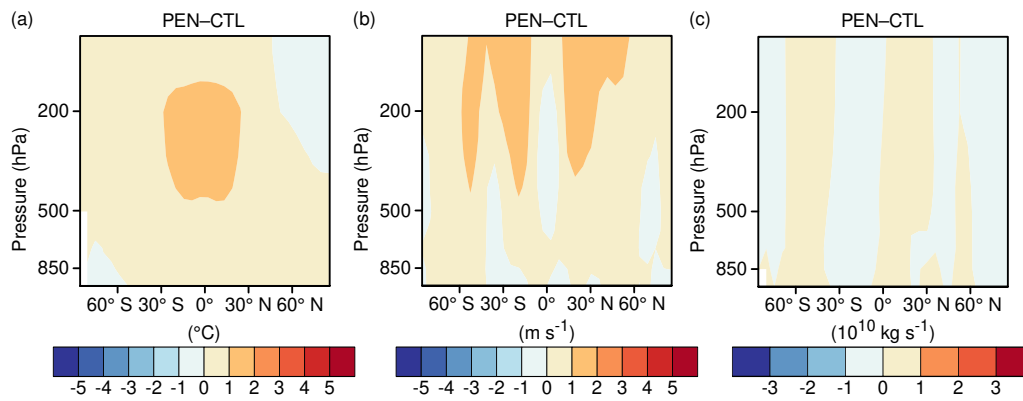

**Figure S8.** Differences in zonal average annual means for the PEN simulation compared with the CTL simulation (PEN minus CTL) at different pressure levels for: (a) air temperature, (b) zonal wind and (c) meridional stream function.

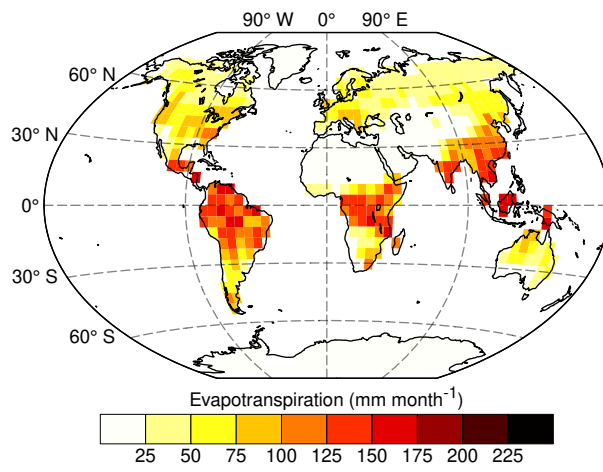

**Figure S9.** Annual mean evapotranspiration result for the CTL simulation used for the MCWD calculation.



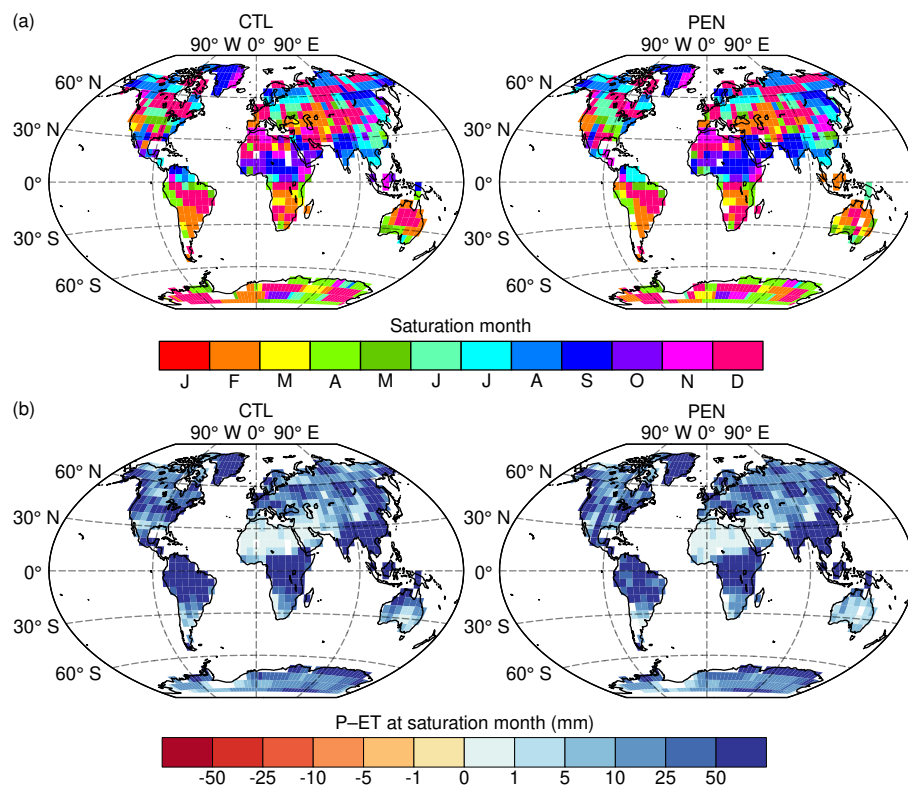

**Figure S10.** Saturation month (a) used in the calculation of MCWD. The first month is January and the last month is December. During these months precipitation (P) exceeded evapotranspiration (ET) in each gridpoint, saturating ground conditions (b). Water deficit accumulation is thus assumed to start at zero.

## References

- Adler, R. F., Huffman, G. J., Chang, A., Ferraro, R., Xie, P.-P., Janowiak, J., Rudolf, B., Schneider, U., Curtis, S., Bolvin, D., et al.: The Version-2 Global Precipitation Climatology Project (GPCP) Monthly Precipitation Analysis (1979-Present), *Journal of Hydrometeorology*, 4, 1147–1167, [https://doi.org/10.1175/1525-7541\(2003\)004<1147:TVGPCP>2.0.CO;2](https://doi.org/10.1175/1525-7541(2003)004<1147:TVGPCP>2.0.CO;2), 2003.
- 5 Allan, R. and Ansell, T.: A New Globally Complete Monthly Historical Gridded Mean Sea Level Pressure Dataset (HadSLP2): 1850-2004, *Journal of Climate*, 19, 5816–5842, <https://doi.org/10.1175/JCLI3937.1>, 2006.
- Dee, D. P., Uppala, S. M., Simmons, A. J., Berrisford, P., Poli, P., Kobayashi, S., Andrae, U., Balmaseda, M. A., Balsamo, G., Bauer, P., Bechtold, P., Beljaars, A. C. M., van de Berg, L., Bidlot, J., Bormann, N., Delsol, C., Dragani, R., Fuentes, M., Geer, A. J., Haimberger, L., Healy, S. B., Hersbach, H., Hólm, E. V., Isaksen, I., Kållberg, P., Köhler, M., Matricardi, M., McNally, A. P., Monge-Sanz, B. M.,  
10 Morcrette, J.-J., Park, B.-K., Peubey, C., de Rosnay, P., Tavolato, C., Thépaut, J.-N., and Vitart, F.: The ERA-Interim Reanalysis: Configuration And Performance Of The Data Assimilation System, *Quarterly Journal of the Royal Meteorological Society*, 137, 553–597, <https://doi.org/10.1002/qj.828>, 2011.
- Hurrell, J. W., Hack, J. J., Shea, D., Caron, J. M., and Rosinski, J.: A New Sea Surface Temperature And Sea Ice Boundary Dataset For The Community Atmosphere Model, *Journal of Climate*, 21, 5145–5153, <https://doi.org/10.1175/2008JCLI2292.1>, 2008.
- 15 Morice, C. P., Kennedy, J. J., Rayner, N. A., and Jones, P. D.: Quantifying Uncertainties In Global And Regional Temperature Change Using An Ensemble Of Observational Estimates: The HadCRUT4 Data Set, *Journal of Geophysical Research: Atmospheres*, 117, 1–22, <https://doi.org/10.1029/2011jd017187>, 2012.
- Zhao, M., Heinsch, F. A., Nemani, R. R., and Running, S. W.: ImprovementS Of The MODIS Terrestrial Gross And Net Primary Production Global Data Set, *Remote Sensing of Environment*, 95, 164–176, <https://doi.org/10.1016/j.rse.2004.12.011>, 2005.
