# Supplementary material for: Tipping the ENSO into a permanent El Niño can trigger state transitions in global terrestrial ecosystems
Source: Copernicus journal article supplement (doi:10.5194/esd-2019-14), 2019-04-10
Supplement: Supplementary file [file esd-2019-14-AC3-supplement.pdf]

# Supplementary information for Referee Comment #1 on “*Tipping the ENSO into a permanent El Niño can trigger state transitions in global terrestrial ecosystems*”

Mateo Duque-Villegas<sup>1</sup>, Juan F. Salazar<sup>1</sup>, and Angela M. Rendón<sup>1</sup>

<sup>1</sup>GIGA, Escuela Ambiental, Facultad de Ingeniería, Universidad de Antioquia, Medellín, Colombia

**Correspondence:** Juan F. Salazar (juan.salazar@udea.edu.co)

## List of Figures

|    |                                                                                                 |   |
|----|-------------------------------------------------------------------------------------------------|---|
| C1 | Differences among PEN simulations with different CO <sub>2</sub> : surface fields . . . . .     | 2 |
| C2 | Differences among PEN simulations with different CO <sub>2</sub> : atmospheric fields . . . . . | 3 |
| C3 | Differences among PEN simulations with different CO <sub>2</sub> : water deficit . . . . .      | 4 |
| C4 | Comparison of forcing SST in PEN and Pliocene . . . . .                                         | 5 |
| C5 | Annual mean results for PEN compared with observations during El Niño . . . . .                 | 6 |
| C6 | Comparison of biases between CTL and PEN . . . . .                                              | 7 |
| C7 | Comparison between members and ensemble mean for CTL . . . . .                                  | 8 |
| C8 | Walker circulation . . . . .                                                                    | 9 |

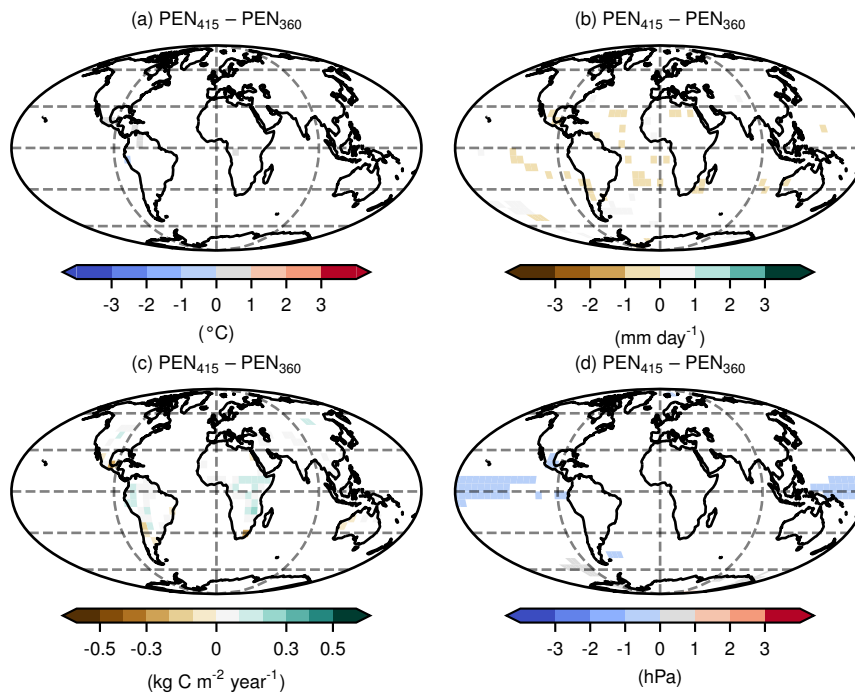

**Figure C1.** Differences among PEN simulations with different atmospheric CO<sub>2</sub> values for variables: (a) near surface temperature, (b) total precipitation rate, (c) gross primary production and (d) mean sea-level surface pressure. CO<sub>2</sub> values are shown as subscripts. White is for statistically non-significant differences ( $\alpha = 0.05$ ). Gridlines are spaced every 30° in the parallels from the Equator, and every 90° in the meridians from Greenwich. This figure will not be included in the revised manuscript, but perhaps as supplementary material.

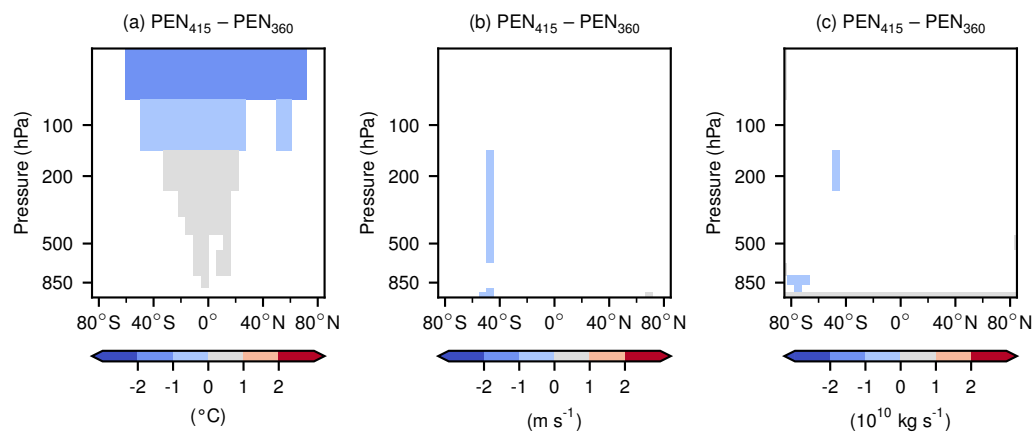

**Figure C2.** Differences among PEN simulations with different atmospheric CO<sub>2</sub> values for variables: (a) air temperature, (b) zonal wind speed and (c) zonal mean meridional mass streamfunction. White is for statistically non-significant differences ( $\alpha = 0.05$ ). This figure will not be included in the revised manuscript, but perhaps as supplementary material.

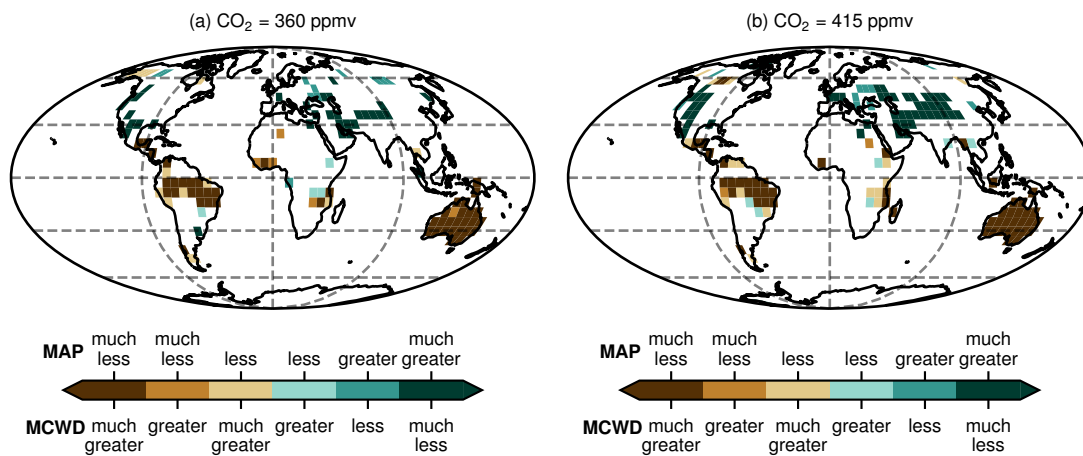

**Figure C3.** Comparison in water deficit results between simulations with different atmospheric CO<sub>2</sub> values: (a) 360 ppm and (b) 415 ppm. The meaning of colors is the same as explained in the manuscript. Gridlines are spaced every 30° in the parallels from the Equator, and every 90° in the meridians from Greenwich. This figure will not be included in the revised manuscript, but perhaps as supplementary material.

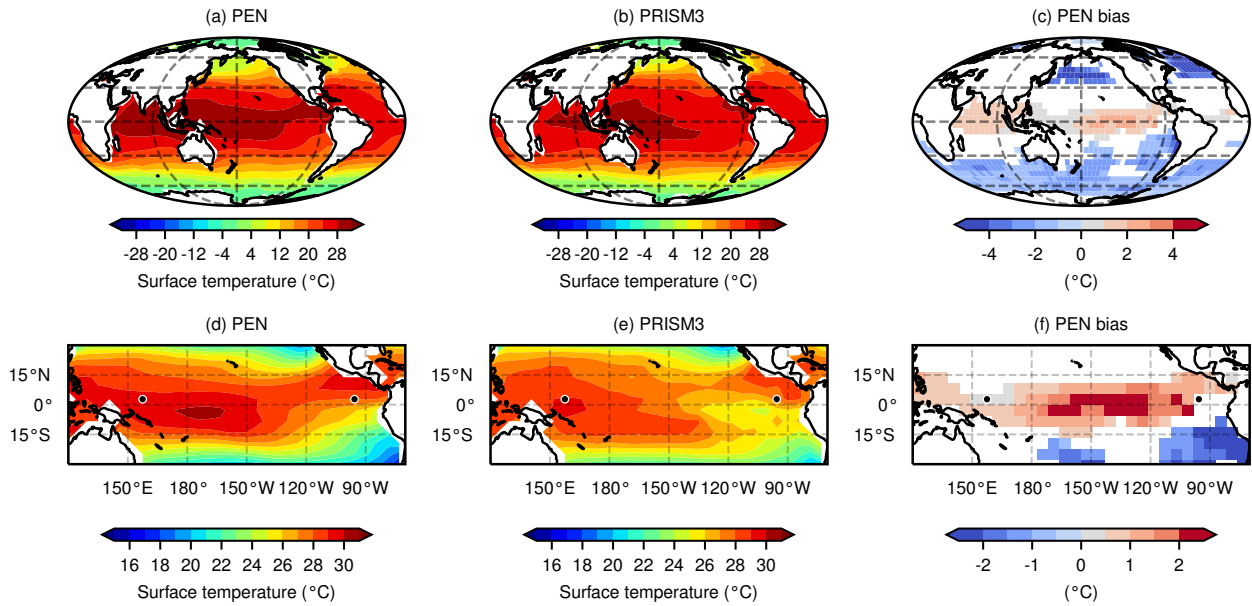

**Figure C4.** (top) Sea surface temperature forcing in (a) PEN simulation, (b) PRISM3 data set and (c) their differences. Gridlines are spaced every  $30^\circ$  in the parallels from the Equator, and every  $90^\circ$  in the meridians from Greenwich. (bottom) Equatorial Pacific sea surface temperature forcing in (d) PEN simulation, (e) PRISM3 data set and (f) their differences. Markers show the west ( $158^\circ$  E,  $2.8^\circ$  N) and east ( $96^\circ$  W,  $2.8^\circ$  N) sites used to compute the zonal gradient. In all bias panels white is for statistically non-significant differences ( $\alpha = 0.05$ ). This figure will not be included in the revised manuscript, but perhaps as supplementary material.

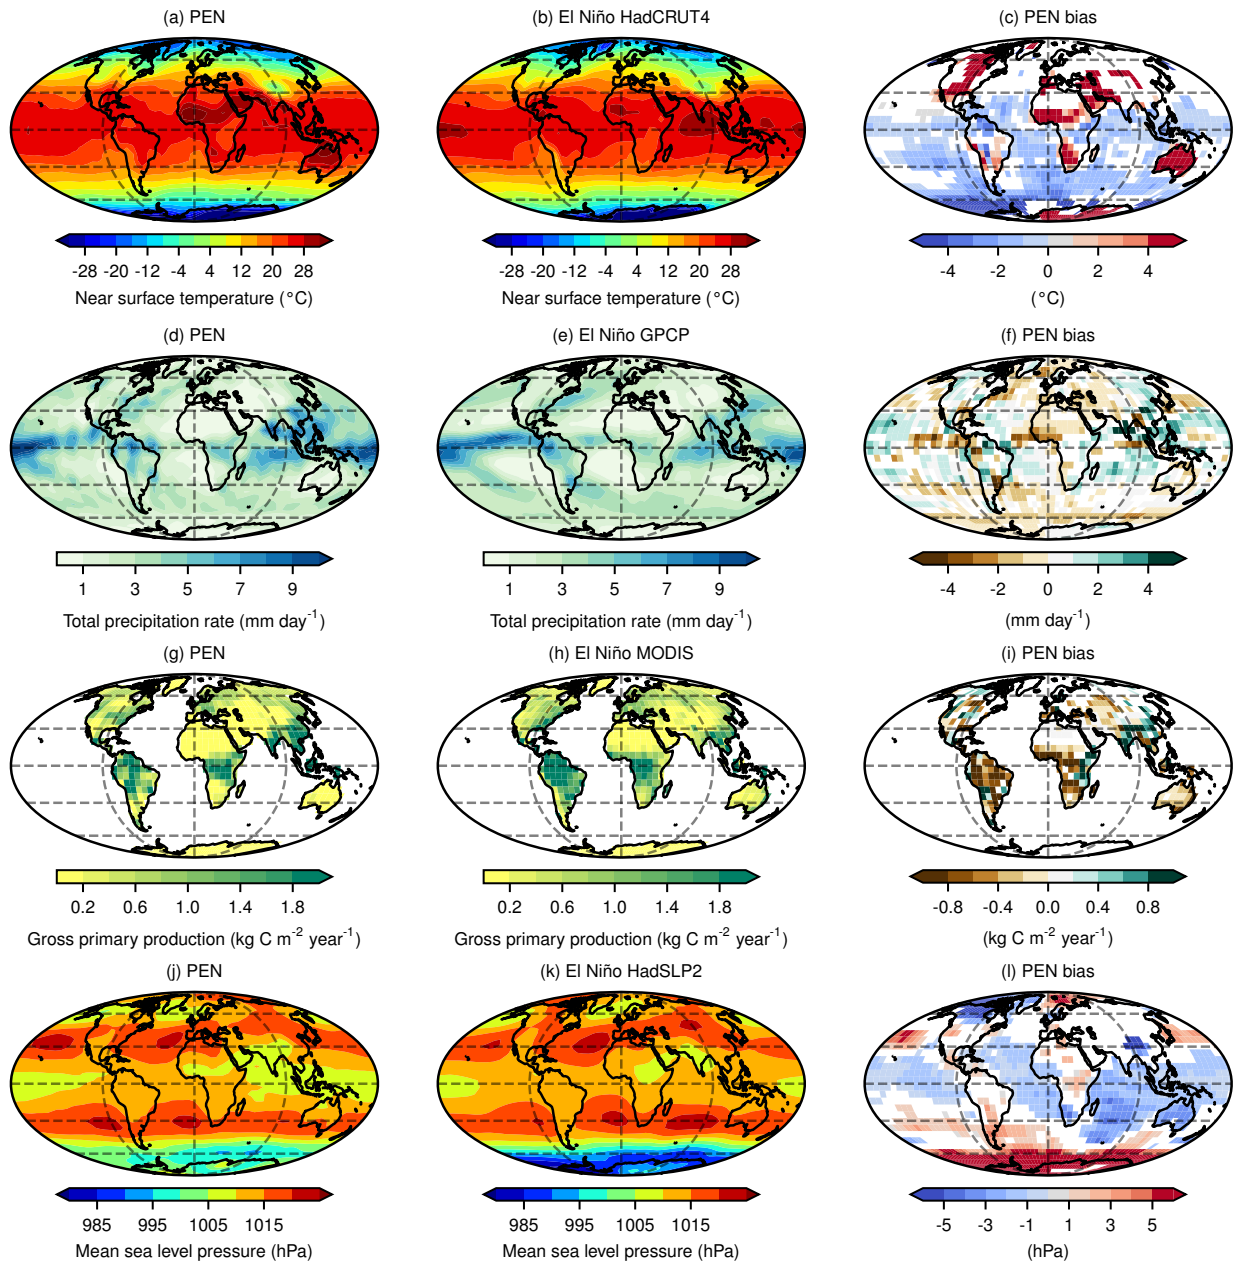

**Figure C5.** Annual mean results for PEN simulation compared with observational data for El Niño years: near surface temperature in (a) PEN, (b) HadCRUT4 mean of 1997 – 98 and 2015 – 16, and (c) PEN bias; total precipitation rate in (d) PEN, (e) GPCP mean of 1997 – 98 and 2015 – 16, and (f) PEN bias; gross primary production in (g) PEN, (h) MODIS mean of 2002 – 03 and 2009 – 10 and (i) PEN bias; and mean sea-level surface pressure in (j) PEN, (k) HadSLP2 mean of 1982 – 83 and 1997 – 98. Gridlines are spaced every  $30^\circ$  in the parallels from the Equator, and every  $90^\circ$  in the meridians from Greenwich. In all bias panels white is for statistically non-significant differences ( $\alpha = 0.05$ ). This figure will not be included in the revised manuscript, but perhaps as supplementary material.

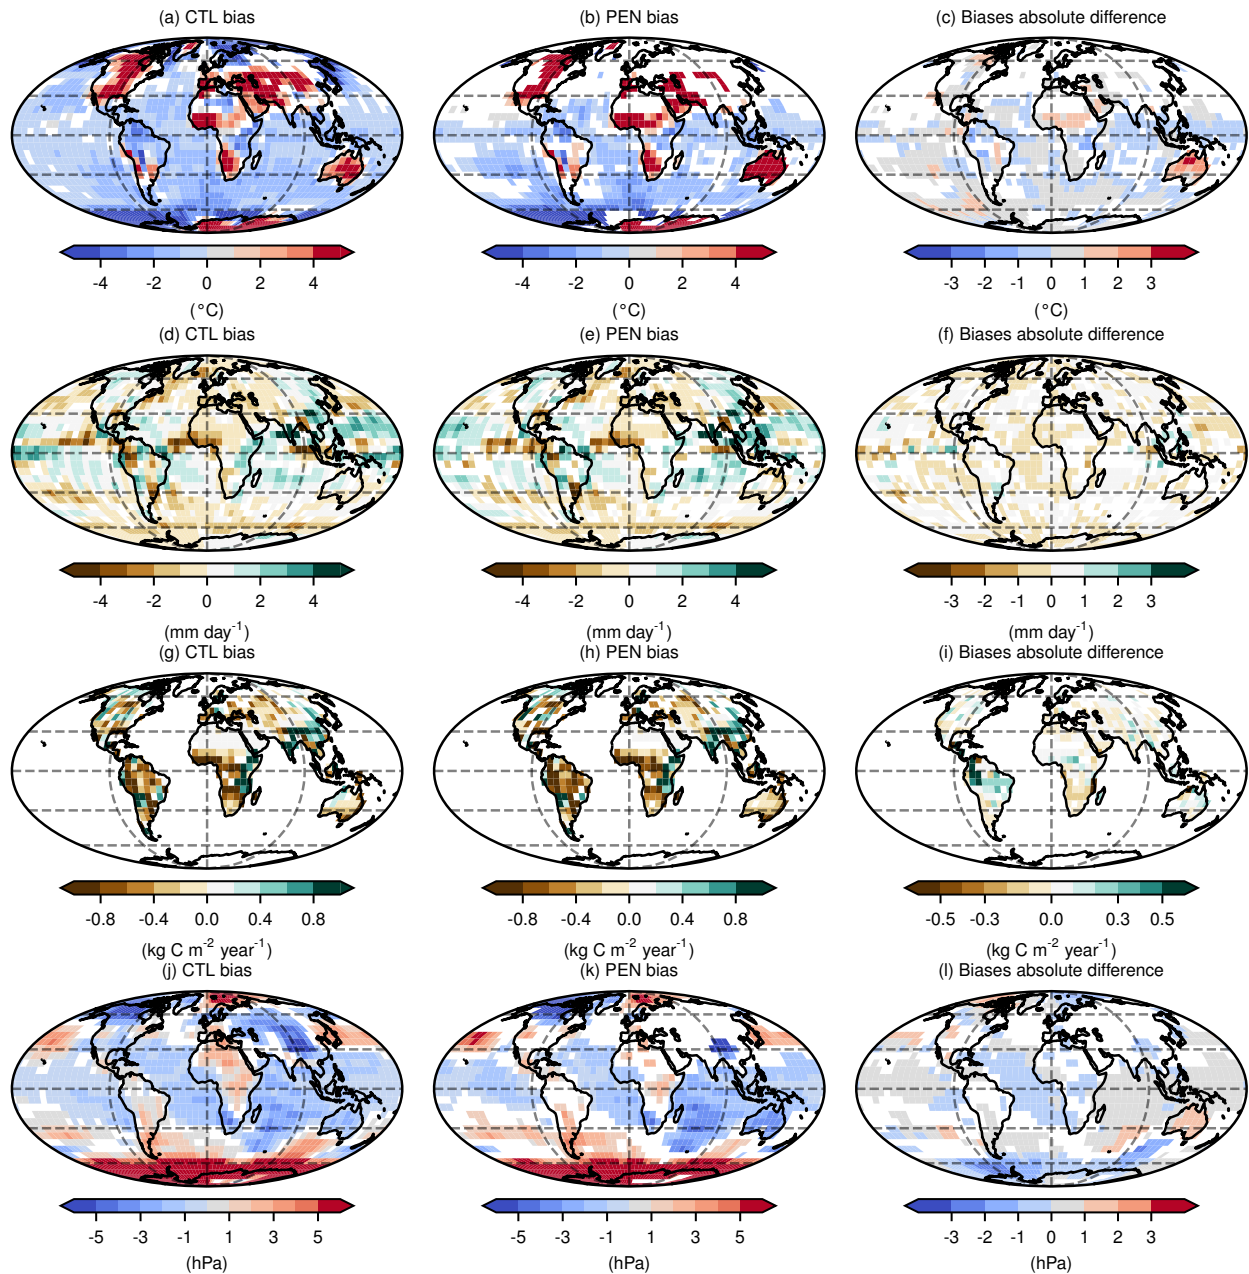

**Figure C6.** Bias panels from CTL simulation compared with PEN and their absolute differences for variables: near surface temperature bias in (a) CTL, (b) PEN and (c) their differences; total precipitation rate bias in (d) CTL, (e) PEN and (f) their differences; gross primary production bias in (g) CTL, (h) PEN and (i) their differences; and mean sea-level surface pressure bias in (j) CTL, (k) PEN and (l) their differences. Gridlines are spaced every  $30^{\circ}$  in the parallels from the Equator, and every  $90^{\circ}$  in the meridians from Greenwich. In all panels white is for statistically non-significant differences ( $\alpha = 0.05$ ). This figure will not be included in the revised manuscript, but perhaps as supplementary material.

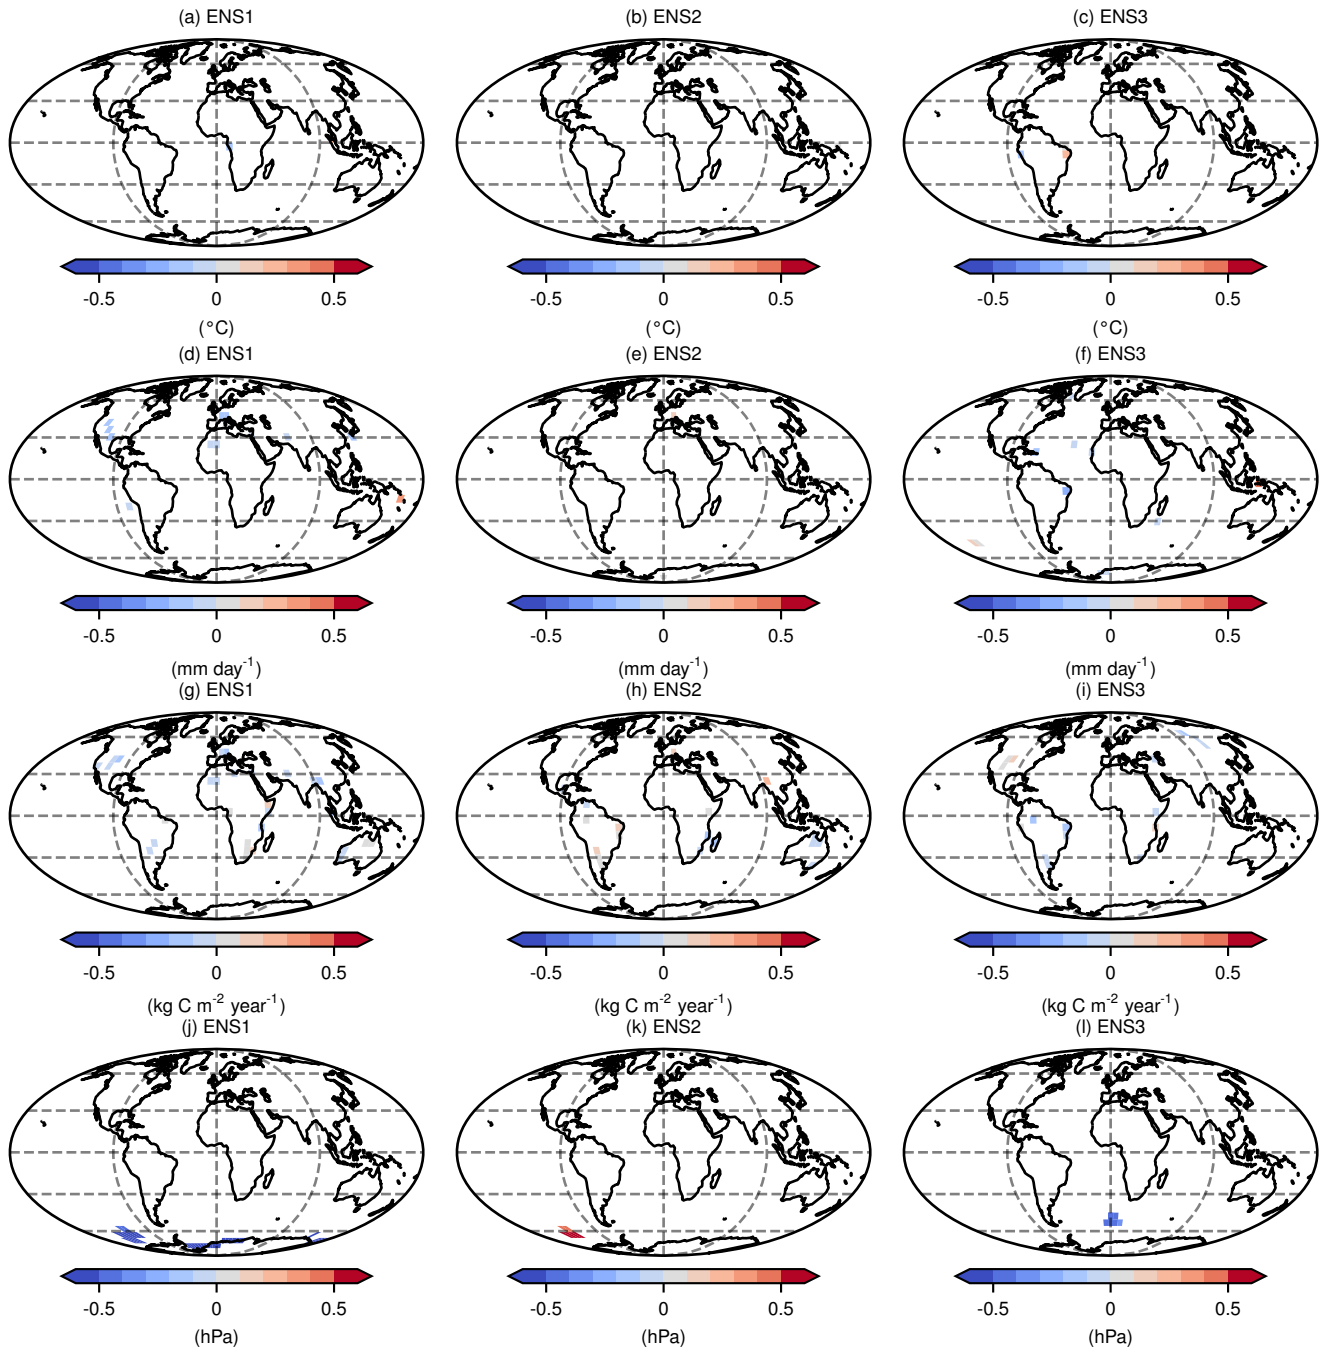

**Figure C7.** Annual mean differences of ensemble members versus the ensemble mean for CTL simulation for variables: near surface temperature (a, b, c), total precipitation rate (d, e, f), gross primary production (g, h, i) and mean sea-level surface pressure (j, k, l). Gridlines are spaced every 30° in the parallels from the Equator, and every 90° in the meridians from Greenwich. In all panels white is for statistically non-significant differences ( $\alpha = 0.1$ ). This figure will not be included in the revised manuscript, but perhaps as supplementary material.



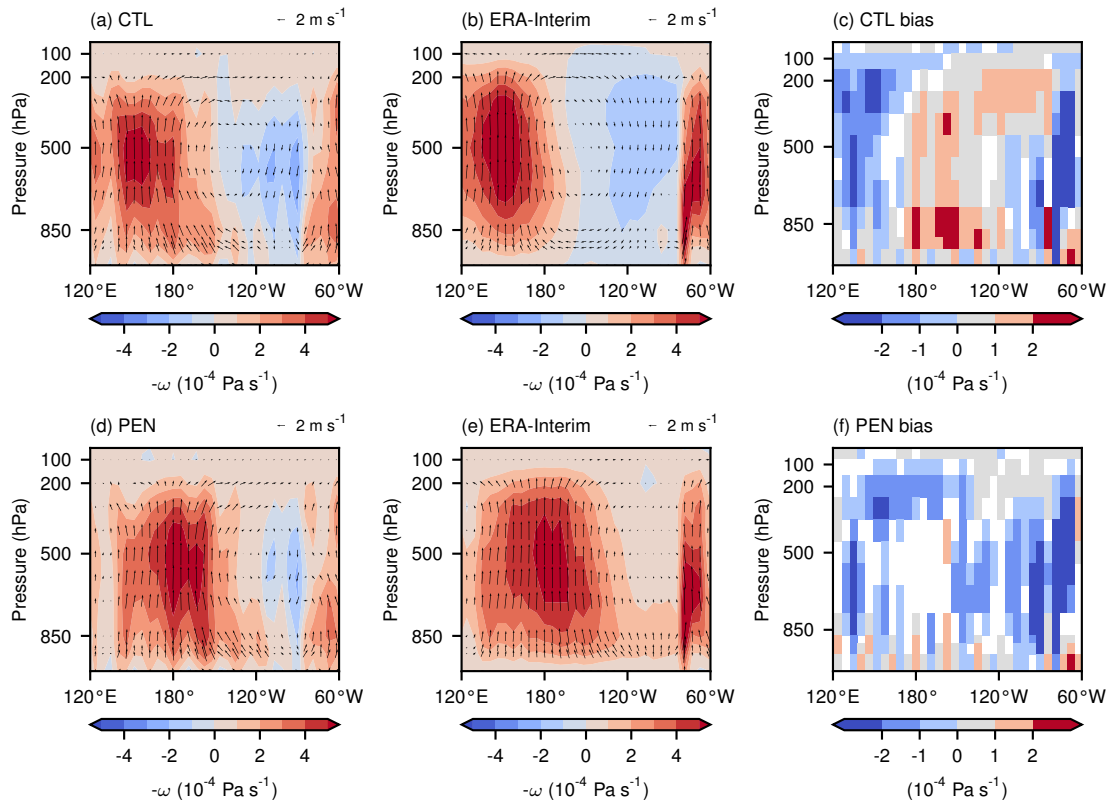

**Figure C8.** Meridional divergent circulation in the equatorial Pacific for (a) CTL simulation, (b) climatological ERA-Interim and (c) CTL bias in vertical velocity values; as well as for (d) PEN simulation, (e) ERA-Interim mean of 1997 – 98 and 2015 – 16, and (f) PEN bias in vertical velocity values. Vectors are plotted using the divergent meridional wind component and the negative vertical velocity in pressure units ( $-\omega$ ), averaged over latitudes  $5^\circ$  S to  $5^\circ$  N. Filled contours show the magnitude and value of the vertical velocity. In all bias panels white is for statistically non-significant differences ( $\alpha = 0.05$ ). This figure will be included in the revised manuscript.
